# Supplementary material for: Regular nicotine intake increased tooth movement velocity, osteoclastogenesis and orthodontically induced dental root resorptions in a rat model
Source: PubMed Central journal article supplement (PMC5709548; doi:10.1038/ijos.2017.34), 2017-09-29
Supplement: ijos201734x1.pdf [file ijos201734x1.pdf]

**Table S1 RT-qPCR information on genes, primers and amplicons used for relative gene expression analyses.**

| Gene symbol                   | Gene name                                                                     | Accession Number <sup>1</sup><br>(NCBI GeneBank) | Chromosomal location<br>(length) | 5'-forward primer-3'<br>(length / T <sub>m</sub> / %GC) | 5'-reverse primer-3'<br>(length / T <sub>m</sub> / %GC) | Primer Location <sup>2</sup> | Intron-spanning<br>(length) | In silico qPCR specificity <sup>3</sup> | Splice variants targeted <sup>2</sup><br>(total number) | Amplicon<br>(length / %GC / T <sub>m</sub> ) | Amplicon position<br>(cDNA)<br>(bp start-stop) |
|-------------------------------|-------------------------------------------------------------------------------|--------------------------------------------------|----------------------------------|---------------------------------------------------------|---------------------------------------------------------|------------------------------|-----------------------------|-----------------------------------------|---------------------------------------------------------|----------------------------------------------|------------------------------------------------|
| <b>PPIB</b>                   | peptidylprolyl isomerase B                                                    | NM_022536.1                                      | 8q24<br>(840bp)                  | ACGTGGTTTTCGGCAAAGT<br>(19bp / 60°C / 47%)              | CTTGGTGTCTCCACCTTCC<br>(20bp / 59°C / 55%)              | exon 4/5                     | yes<br>(664bp)              | yes                                     | no<br>(1)                                               | 62bp / 52%<br>/ 81.0°C                       | 495-556                                        |
| <b>YWHAZ</b>                  | tyrosine 3-monooxygenase /tryptophan 5-monooxygenase activation protein, zeta | NM_013011.3                                      | 7q22<br>(1815bp)                 | CTACCGCTACTTGGCTGAGG<br>(20bp / 60°C / 60%)             | TGTGACTGGTCCACAATTCC<br>(20bp / 59°C / 50%)             | exon 3/4                     | yes<br>(609bp)              | yes                                     | yes<br>(2)                                              | 63bp / 51%<br>/ 80.8°C                       | 436-479                                        |
| <b>IL1B</b>                   | interleukin 1 beta                                                            | NM_031512.2                                      | 3q36<br>(1339bp)                 | TGTGATGAAAGACGGCACAC<br>(20bp / 60°C / 50%)             | CTTCTTCTTTGGGTATTGTTGG<br>(23bp / 59°C / 39%)           | exon 6/7                     | yes<br>(718bp)              | yes                                     | yes<br>(2)                                              | 70bp / 51%<br>/ 81.1°C                       | 617-664                                        |
| <b>IL6</b>                    | interleukin 6                                                                 | NM_012589.1                                      | 4q11<br>(1046bp)                 | CCTGGAGTTTGTGAAGAACAAC<br>(23bp / 59°C / 43%)           | GGAAGTTGGGGTAGGAAGGA<br>(20bp / 60°C / 55%)             | exon 4/5                     | yes<br>(142bp)              | yes                                     | no<br>(1)                                               | 142bp / 37%<br>/ 79.6°C                      | 433-555                                        |
| <b>CXCL1<br/>(IL8-equiv.)</b> | chemokine (C-X-C motif) ligand 1                                              | NM_030845.1                                      | 14p22<br>(929bp)                 | CATTAATATTTAACGATGTGGATGCGTTTCA<br>(31bp / 64°C / 32%)  | GCCTACCATCTTTAACTGCACAAT<br>(25bp / 63°C / 40%)         | exon 4                       | no                          | yes                                     | no<br>(1)                                               | 76bp / 38%<br>/ 78.7°C                       | 493-568                                        |
| <b>CLCN7</b>                  | chloride channel, voltage-sensitive 7                                         | NM_031568.1                                      | 10q12<br>(2750bp)                | TGTCCTACCTCACAGGAGCA<br>(20bp / 59°C / 55%)             | CTCCCATCAGGGCGTATTTA<br>(20bp / 59°C / 50%)             | exon 17/18                   | yes<br>(1216bp)             | yes                                     | no<br>(1)                                               | 60bp / 58%<br>/ 81.4°C                       | 1657-1716                                      |
| <b>CTSK</b>                   | cathepsin K                                                                   | NM_031560.2                                      | 2q34<br>(1446bp)                 | CGACTATCGAAAGAAAGGCTATG<br>(23bp / 59°C / 43%)          | AAAGCCCAACAGGAACCAC<br>(19bp / 59°C / 53%)              | exon 4/5                     | yes<br>(1944bp)             | yes                                     | no<br>(1)                                               | 69bp / 48%<br>/ 80.4°C                       | 430-498                                        |

PPIB/YWHAZ were used as reference genes for normalization. All primers (except CXCL1) were constructed with Roche®ProbeFinder 2.5 (Primer3/Version 1.1.4). Unmodified intron-spanning primers were constructed whenever possible, synthesized by EurofinsMWGOperonLLC (Huntsville/AL/USA) and purified by HighPurity-Salt-Free-Purification HPSF®.

T<sub>m</sub>=melting temperature of primer/specific qPCR product (amplicon); %GC = guanine/cytosine content; bp = base pairs.

<sup>1</sup>Primer design based on this sequence. The database source was the NCBI Nucleotide database (<http://www.ncbi.nlm.nih.gov/nucleotide>).

<sup>2</sup>determined with PrimerCheck (<http://projects.insilico.us/SpliceCenter/PrimerCheck>; SpliceCenter).

<sup>3</sup>determined *in silico* by Roche® ProbeFinder 2.5 (<http://qpcr.probefinder.com/organism.jsp>) or the UCSC In-Silico-PCR database (<http://genome.ucsc.edu/cgi-bin/hgPcr>).
