# Supplementary material for: Regular nicotine intake increased tooth movement velocity, osteoclastogenesis and orthodontically induced dental root resorptions in a rat model
Source: PubMed Central journal article supplement (PMC5709548; doi:10.1038/ijos.2017.34), 2017-09-29
Supplement: ijos201734x2.pdf [file ijos201734x2.pdf]

**Table S2. Data on RT-qPCR validity, efficiency and technical reliability.**

| Gene symbol                  | Slope | Efficiency E (%) | 95% CI of Efficiency E | Coefficient of determination R <sup>2</sup> (adjusted) | Intraassay reliability SD of triplet C <sub>q</sub> means* (mean, min./max.) |
|------------------------------|-------|------------------|------------------------|--------------------------------------------------------|------------------------------------------------------------------------------|
| <b>PPIB</b>                  | -3.37 | 98.0             | 93.0 - 103.5           | 0.994                                                  | 0.06, 0.00/0.26                                                              |
| <b>YWHAZ</b>                 | -3.28 | 101.9            | 98.6 - 105.4           | 0.998                                                  | 0.07, 0.02/0.23                                                              |
| <b>IL1B</b>                  | -3.48 | 93.9             | 90.4 - 97.7            | 0.997                                                  | 0.16, 0.01/ <b>0.48</b>                                                      |
| <b>IL6</b>                   | -3.16 | 107.1            | 105.1 - 109.5          | 0.987                                                  | 0.33, 0.08/ <b>0.48</b>                                                      |
| <b>CXCL1</b><br>(IL8 equiv.) | -3.17 | 106.6            | 104.2 - 109.6          | 0.998                                                  | 0.16, 0.03/0.46                                                              |
| <b>CLCN7</b>                 | -3.50 | 93.2             | 90.9 - 95.6            | 0.999                                                  | 0.16, 0.04/0.38                                                              |
| <b>CTSK</b>                  | -3.29 | 101.3            | 98.0 - 105.1           | 0.997                                                  | 0.05, 0.00/0.17                                                              |

Data based on a standard curve from an 8x log<sub>10</sub> cDNA dilution series of each gene/primer pair. For each gene and biological sample, gene expression was quantified in triplets within the same qPCR plate. \* three technical replicates (triplet), across all tissue samples/biological replicates (n = 21). CI = confidence interval; SD = standard deviation; min. = minimum; max. = maximum. Coefficient of determination R<sup>2</sup> as measure for the relationship C<sub>q</sub> value – RNA-concentration was calculated by linear regression. qPCR efficiencies (E) were obtained by the equation  $E = [10^{(-1/\text{slope})} - 1] \times 100$  from the standard curve and are given as percentage.
