# Supplementary material for: Regular nicotine intake increased tooth movement velocity, osteoclastogenesis and orthodontically induced dental root resorptions in a rat model
Source: PubMed Central journal article supplement (PMC5709548; doi:10.1038/ijos.2017.34), 2017-09-29
Supplement: ijos201734x3.pdf [file ijos201734x3.pdf]

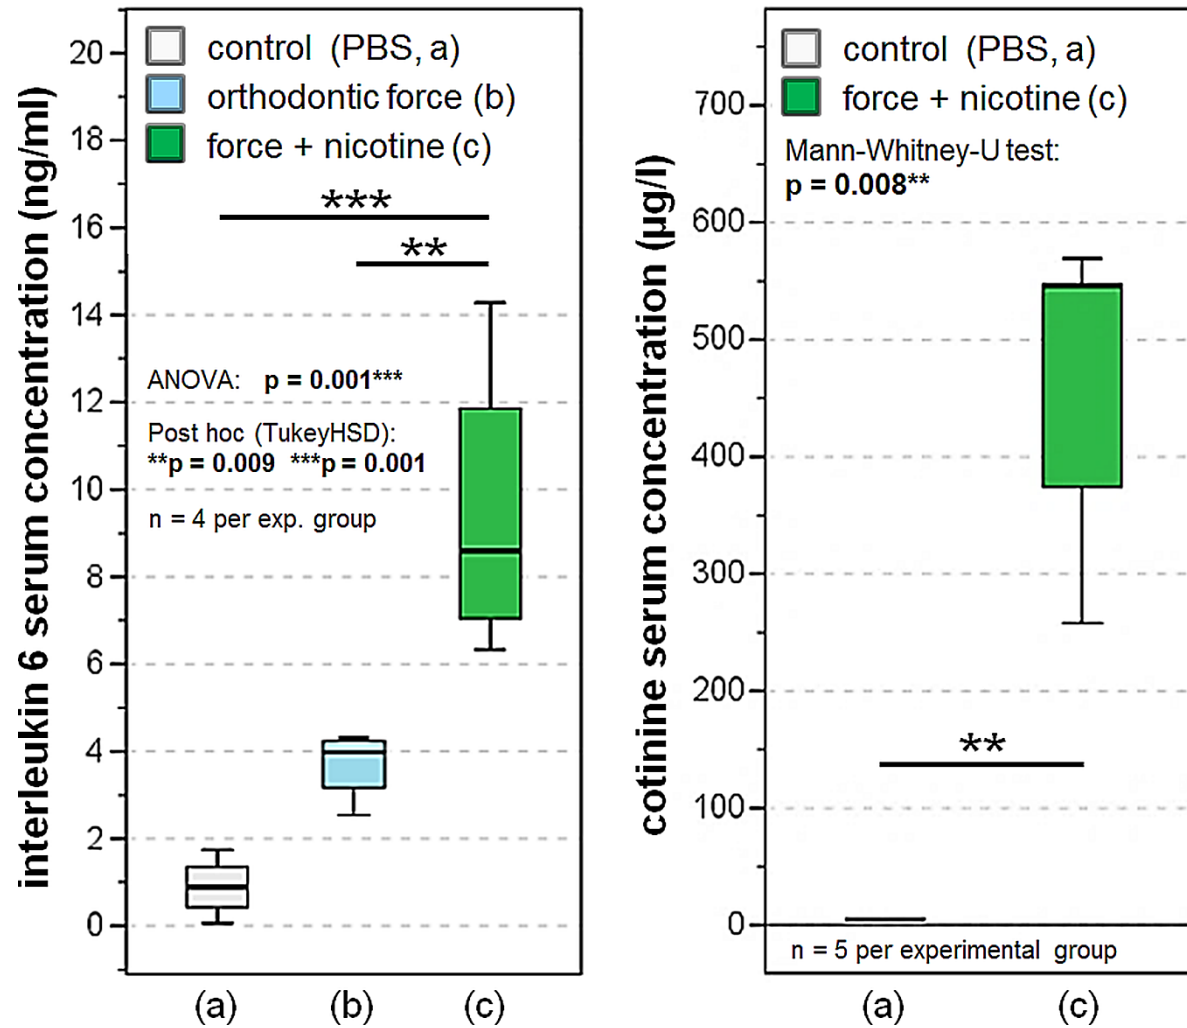

**Figure S1 Interleukin 6 and cotinine (nicotine metabolite) concentration within the blood serum after 14 days of orthodontic therapy and 25 days of nicotine administration.  $n=4/5$  (number of samples per experimental group). Boxplots show median and interquartile ranges, and whiskers denote the data range.**
