# Supplementary material for: Regular nicotine intake increased tooth movement velocity, osteoclastogenesis and orthodontically induced dental root resorptions in a rat model
Source: PubMed Central journal article supplement (PMC5709548; doi:10.1038/ijos.2017.34), 2017-09-29
Supplement: ijos201734x4.pdf [file ijos201734x4.pdf]

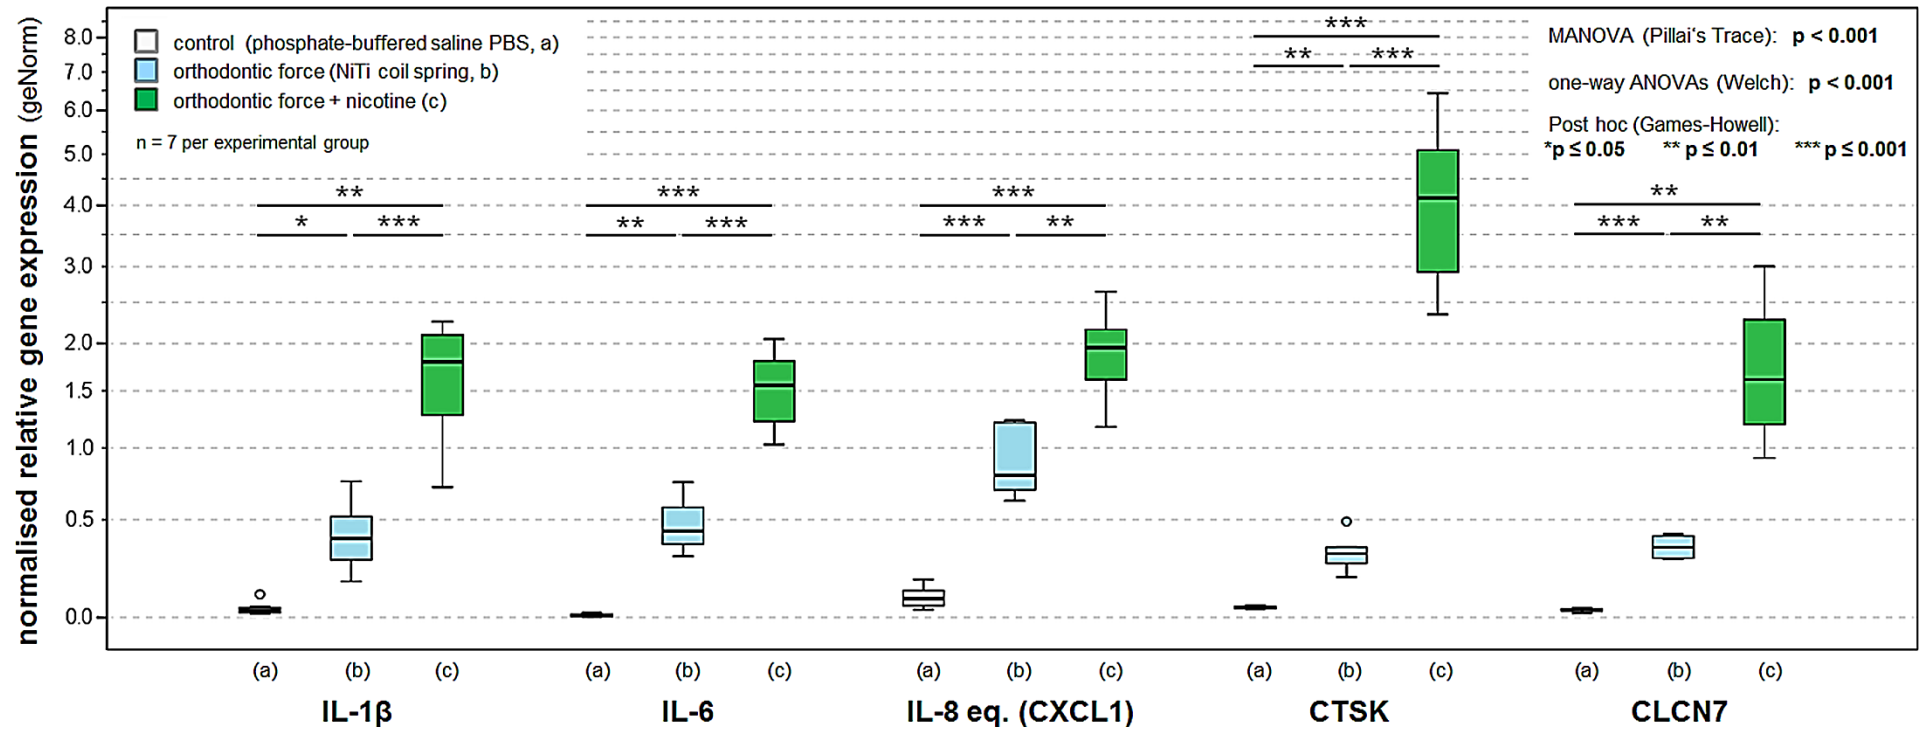

**Figure S2 Relative normalized gene expression (three inflammatory and two osteoclast markers) after 14 days of orthodontic therapy in the dental-periodontal tissue of the first and second upper left rat molars (M1/M2).** Abbreviations see Table S1. n=7 (number of samples per experimental group). Boxplots show median and interquartile ranges, and whiskers denote the data range.
