# Supplementary material for: Regular nicotine intake increased tooth movement velocity, osteoclastogenesis and orthodontically induced dental root resorptions in a rat model
Source: PubMed Central journal article supplement (PMC5709548; doi:10.1038/ijos.2017.34), 2017-09-29
Supplement: ijos201734x5.pdf [file ijos201734x5.pdf]

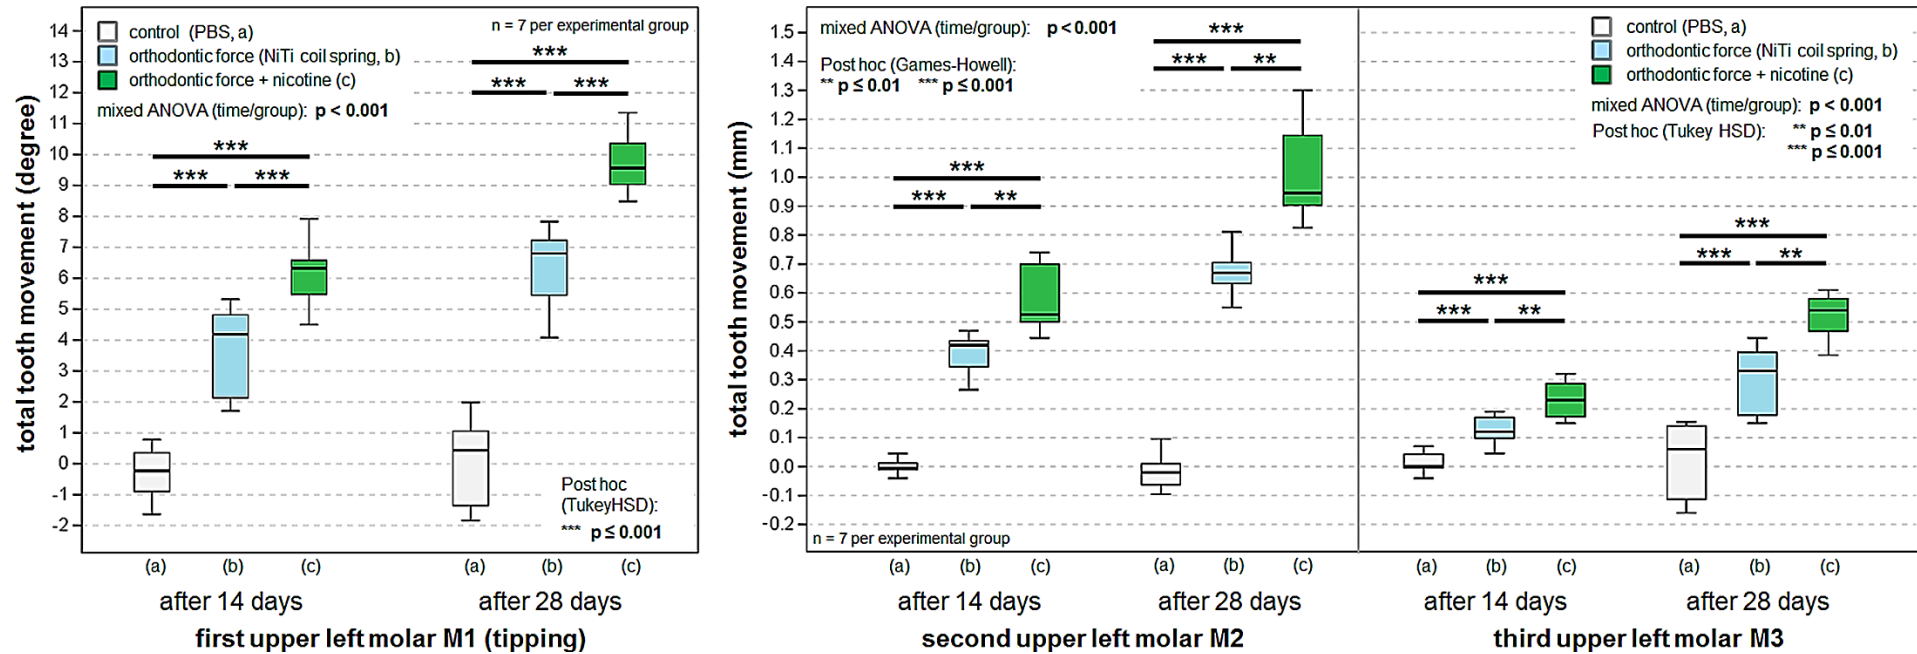

**Figure S3 Radiological quantification of orthodontic tooth movement of the first and second upper left molars (M1/M2) and mesial drift of the third molar M3. n=7 (number of samples per experimental group). Boxplots show median and interquartile ranges, and whiskers denote the data range.**
